# Supplementary material for: Behavior of NDMA precursors at 21 full-scale water treatment facilities
Source: Royal Society of Chemistry journal article supplement (doi:10.1039/c8ew00442k), 2018-01-01
Supplement: c8ew00442k1.pdf [file c8ew00442k1.pdf]

## Supplementary Information

### Behavior of NDMA Precursors at 21 Full-Scale Water Treatment Facilities

Stuart W. Krasner<sup>a,\*</sup>, Paul Westerhoff<sup>b</sup>, William A. Mitch<sup>c</sup>, David Hanigan<sup>d</sup>, Daniel L. McCurry<sup>e</sup>,  
and Urs von Gunten<sup>f,g</sup>

<sup>a</sup>Metropolitan Water District of Southern California, Water Quality, La Verne, CA 91750, USA

<sup>b</sup>Arizona State University, School of Sustainable Engineering and the Built Environment, Tempe, AZ 85259-3005, USA

<sup>c</sup>Stanford University, Department of Civil and Environmental Engineering, Stanford, CA, 94305, USA

<sup>d</sup>University of Nevada - Reno, Department of Civil and Environmental Engineering, Reno, NV 89557-0258, USA

<sup>e</sup>University of Southern California, Astani Department of Civil and Environmental Engineering, Los Angeles, CA, 90089, USA

<sup>f</sup>Eawag, Swiss Federal Institute of Aquatic Science and Technology, Dübendorf, Switzerland, CH-8600

<sup>g</sup>School of Architecture, Civil and Environmental Engineering (ENAC), Ecole Polytechnique Fédérale de Lausanne (EPFL), Lausanne, Switzerland, CH-1015.

\**Corresponding author.* Tel.: +1 909 392-5083; fax: +1 909 392-5246

E-mail addresses: [skrasner@mwdh2o.com](mailto:skrasner@mwdh2o.com) (S.W. Krasner), [P.WESTERHOFF@asu.edu](mailto:P.WESTERHOFF@asu.edu) (P. Westerhoff), [wamitch@stanford.edu](mailto:wamitch@stanford.edu) (W.A. Mitch), [dhanigan@unr.edu](mailto:dhanigan@unr.edu) (D. Hanigan), [dmccurry@usc.edu](mailto:dmccurry@usc.edu) (D.L. McCurry), [vongunten@eawag.ch](mailto:vongunten@eawag.ch) (U. von Gunten).

2 tables

3 figures

11 pages

## **TABLES**

Table S1. Treatment/disinfection processes at participating DWTPs

Table S2. Water quality at participating DWTPs (basic survey samples)

## FIGURES

Figure S1. NDMA yield from polymer usage ( $[\text{settled water NDMA FP} - \text{NDMA FP of water before polymer addition}]$  divided by polymer dose as the active ingredient) at 7 DWTPs with polyDADMAC and 1 DWTP with polyamine, where  $n$  is the number of samples for each polymer type

Figure S2. Impact of free chlorine exposure (pH 7.6) and pH at selected conditions on NDMA formation in DWTP 3 settled water during post-chloramination (pH 8.3, 25°C, 6.5 days). Blank spot indicates that test condition was not evaluated.

Figure S3. Impact of free chlorine contact time (pH 7.2) on SDS NDMA and SDS THM4 formation in DWTP 12 raw water during post-chloramination (pH 8, 25°C, 3 days)

**Table S1. Treatment /disinfection processes at participating DWTPs**

| Plt | Pre-Treat. | Coag.       | Poly. | Lime Soft. | Filt.      | BAF | BAC | PAC | GAC | Cl <sub>2</sub> | ClO <sub>2</sub> | O <sub>3</sub> | NH <sub>3</sub> | UV |
|-----|------------|-------------|-------|------------|------------|-----|-----|-----|-----|-----------------|------------------|----------------|-----------------|----|
| 1   |            | X           |       |            | X          |     |     |     |     | int.,<br>post   |                  | int.           |                 |    |
| 2   |            | X           | PAM   |            |            |     | X   |     |     | post            |                  | int.           | post            |    |
| 3   |            | X           | pDAD  | X          | X          |     |     | X   |     | int.            |                  |                | int.            |    |
| 4   | RBF        |             |       | X          | X          |     |     |     |     | int.            |                  |                | post            |    |
| 5   |            | X           | pDAD  |            | X          |     |     |     | X   | post            |                  |                |                 |    |
| 6   |            | X           | pDAD  | X          |            |     | X   |     |     | post            |                  | int.           | post            |    |
| 7   |            | X           |       | X          | X          |     |     | X   |     | post            |                  |                | int.            |    |
| 8   |            | X           | pDAD  | X          | X          |     |     |     |     | pre,<br>post    |                  | pre            | pre,<br>post    |    |
| 9   |            | X           | pDAD  |            |            |     | X   |     |     | post            |                  | pre,<br>int.   | post            |    |
| 10  |            | X           | pDAD  |            |            |     |     |     | X   | pre,<br>post    |                  |                | post            |    |
| 11  |            | X           | pDAD  |            |            |     |     |     | X   | post            | pre,<br>int.     |                | post            |    |
| 12  |            | X           |       |            | UF         |     |     |     |     | pre,<br>post    |                  |                | post            | X  |
| 13  |            | X           | pDAD  |            | X          |     |     |     |     | pre,<br>post    |                  |                | post            | X  |
| 14  |            | X or<br>DAF | pDAD  |            | X or<br>MF |     |     |     | X   | int.,<br>post   |                  |                |                 |    |
| 15  |            | X           |       |            | UF         |     |     |     |     | pre             |                  |                | int.            |    |
| 16  |            | X           | pDAD  |            |            | X   |     |     |     | pre,<br>post    |                  | pre            | pre,<br>post    |    |
| 17  |            | X           | pDAD  |            |            |     | X   |     |     | pre,<br>post    |                  | int.,<br>post  | post            |    |

(continued)

Table S1 (continued)

| Plt | Pre-Treat.              | Coag. | Poly.      | Lime Soft. | Filt.   | BAF | BAC | PAC | GAC | Cl <sub>2</sub> | ClO <sub>2</sub> | O <sub>3</sub> | NH <sub>3</sub> | UV |
|-----|-------------------------|-------|------------|------------|---------|-----|-----|-----|-----|-----------------|------------------|----------------|-----------------|----|
| 18  |                         | X     | pDAD       |            | X       |     |     |     |     | pre,<br>int.    |                  | int.           | post            |    |
| 19  |                         |       | pDAD       |            | in-line |     |     |     |     | pre,<br>post    |                  |                | post            |    |
| 20  | MIEX                    | X     | poly-amine |            | X       |     |     |     |     | post            |                  |                |                 |    |
| 21  | activ. SiO <sub>2</sub> | X     |            |            | X       |     |     |     |     | post            |                  |                | post            |    |

Abbreviations:

BAC = biologically active carbon

BAF = biofiltration

Cl<sub>2</sub> = chlorine (or hypochlorite)

ClO<sub>2</sub> = chlorine dioxide

CO<sub>2</sub> = carbon dioxide

coag. = coagulation

DAF = dissolved air flotation

filt. = filtration

GAC = granular activated carbon

int. = intermediate-oxidation/intermediate-  
disinfection (e.g., at filter influent)

MIEX = magnetic ion exchange resin

MF = microfiltration

NH<sub>3</sub> = ammonia

O<sub>3</sub> = ozonation

PAC = powdered activated carbon

PAM = polyacrylamide

pDAD = polyDADMAC

poly. = polymer

post = post-oxidation/post-disinfection (e.g.,  
at filter effluent)

pre = pre-oxidation/pre-disinfection (e.g., at  
plant influent)

RBF = riverbank filtration

SiO<sub>2</sub> = silica dioxide

soft. = softening

UF = ultrafiltration

UV = ultraviolet

**Table S2. Water quality at participating DWTPs (basic survey samples)**

| Plant | Date    | Plant Influent |                                          |                   |                     | Treated Water |                                          |                   |
|-------|---------|----------------|------------------------------------------|-------------------|---------------------|---------------|------------------------------------------|-------------------|
|       |         | TOC<br>(mg/L)  | UV <sub>254</sub><br>(cm <sup>-1</sup> ) | NDMA<br>FP (ng/L) | Sucralose<br>(μg/L) | TOC<br>(mg/L) | UV <sub>254</sub><br>(cm <sup>-1</sup> ) | NDMA<br>FP (ng/L) |
| 2     | 3/5/12  | 4.4            | 0.13                                     | 7.7               | ND                  | 1.5           | 0.14                                     | 29                |
| 2     | 6/4/13  | 2.1            | 0.078                                    | 6.3               | 0.3                 | 0.2           | 0                                        | 3.6               |
| 3     | 2/6/12  | 2.7            | 0.066                                    | 14                | 0.28                | 1.5           | 0.024                                    | 11                |
| 3     | 8/13/12 | 3.2            | 0.071                                    | 22                | 1.3                 | 2.3           | 0.045                                    | 16                |
| 4     | 2/6/12  | 1.5            | 0.026                                    | 3.8               | 0.35                | 1.4           |                                          | 2.1               |
| 4     | 8/13/12 | 1.4            | 0.024                                    | 10                | 0.99                | 1.3           | 0.031                                    | ---               |
| 5     | 2/6/12  | 3.0            | 0.07                                     | 16                | 0.18                | 1.0           | 0.005                                    | 3.4               |
| 5     | 2/4/13  | 3.8            | 0.104                                    | 12                | 0.13                | 1.0           | 0.024                                    | 4.6               |
| 6     | 3/26/12 | 4.9            | 0.208                                    | 74                | 0.26                | 3.1           | 0.044                                    | 13                |
| 6     | 9/24/12 | 4.3            | 0.108                                    | 33                | 1.2                 | 2.2           | 0.025                                    | 12                |
| 7     | 2/21/12 | 7.0            | 0.13                                     | 44                | 0.92                | 3.4           | 0.05                                     | 39                |
| 7     | 8/20/12 | 12.7           | 0.407                                    | 53                | <0.2                | 5.7           | 0.104                                    | 44                |
| 9     | 7/30/12 | 6.2            | 0.097                                    | 23                | 0.44                | 3.0           | 0.028                                    | 19                |
| 10    | 10/8/12 | 3.2            | 0.042                                    | 13                | ND                  | 1.4           | 0.015                                    | 9.0               |
| 11    | 10/8/12 | 4.5            | 0.108                                    | 11                | ND                  | 2.6           | 0.044                                    | 7.9               |
| 12    | 7/9/12  | 5.3            | 0.077                                    | 46                | 6.3                 | 4.2           | 0.059                                    | 10                |
| 12    | 1/7/13  | 3.8            | 0.050                                    | 63                | 4.4                 | 3.8           | 0.050                                    | ---               |
| 13    | 7/9/12  | 1.76           | 0.028                                    | 7.3               | 0.24                | 1.5           | 0.022                                    | 16                |

(continued)

Table S2 (continued)

| Plant | Date     | Plant Influent |                                          |                   |                     | Treated Water |                                          |                   |
|-------|----------|----------------|------------------------------------------|-------------------|---------------------|---------------|------------------------------------------|-------------------|
|       |          | TOC<br>(mg/L)  | UV <sub>254</sub><br>(cm <sup>-1</sup> ) | NDMA<br>FP (ng/L) | Sucralose<br>(µg/L) | TOC<br>(mg/L) | UV <sub>254</sub><br>(cm <sup>-1</sup> ) | NDMA<br>FP (ng/L) |
| 14    | Apr '12  | 3.1            | 0.048                                    | 27                | 0.80                | 1.6           | 0.012                                    | 6.2               |
| 14    | 3/18/13  | 3.0            | 0.046                                    | 12                | 0.65                | 1.3           | 0.014                                    | 4.0               |
| 15    | 4/16/12  | 5.6            | 0.16                                     | 16                | 1.0                 | 3.4           | 0.070                                    | ---               |
| 16    | 4/16/12  | 5.8            | 0.16                                     | 16                | 1.0                 | 3.0           | 0.038                                    | 18                |
| 16    | 10/22/12 | 3.4            | 0.076                                    | 10                | 0.72                | 2.0           | 0.027                                    | 5.0               |
| 17    | 9/17/12  | 2.5            | 0.064                                    | 10                | 0.76                | 1.3           | 0.011                                    | 10                |
| 17    | 4/15/13  | 3.2            | 0.085                                    | 11                | 0.62                | 2.1           | 0.024                                    | 4.3               |
| 18    | 5/7/12   | 4.9            | 0.13                                     | 9.6               | <0.20               | 2.9           | 0.039                                    | 6.9               |
| 19    | 7/22/13  | 1.6            | 0.037                                    | 2.0               | ND                  | 1.4           | 0.023                                    | 2.0               |
| 20    | 11/5/12  | 3.3            | 0.068                                    | 4.8               | ND                  | 1.4           | 0.014                                    | 24                |
| 20    | 5/6/13   | 3.2            | 0.078                                    | 4.8               | ND                  | 1.3           | 0.013                                    | 19                |
| 21    | 6/4/12   | 7.4            | 0.26                                     | 5.5               | <0.20               | 3.2           | 0.062                                    | 5.2               |

ND = Not detected

--- = Not analyzed



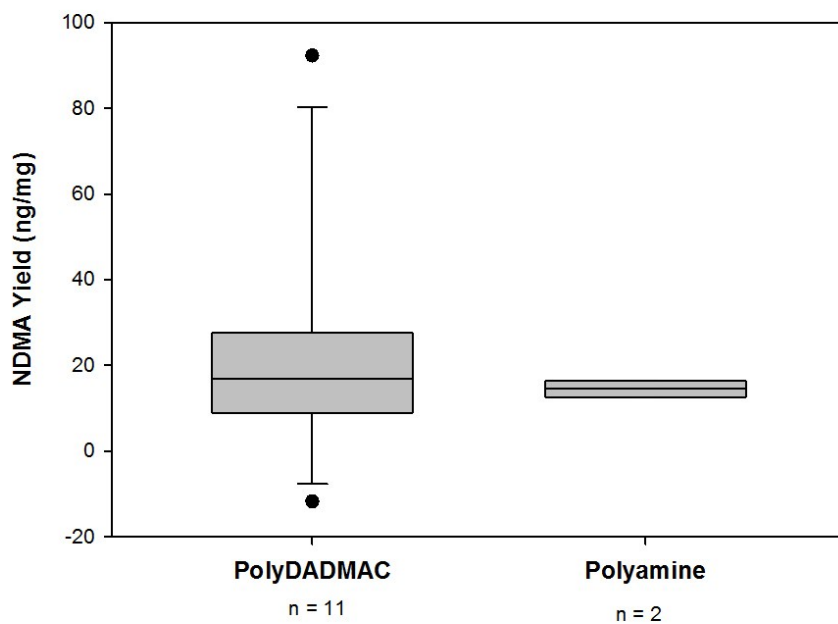

**Figure S1. NDMA yield from polymer usage ([settled water NDMA FP minus NDMA FP of water before polymer addition] divided by polymer dose as the active ingredient) at 7 DWTPs with polyDADMAC and 1 DWTP with polyamine, where n is the number of samples for each polymer type**

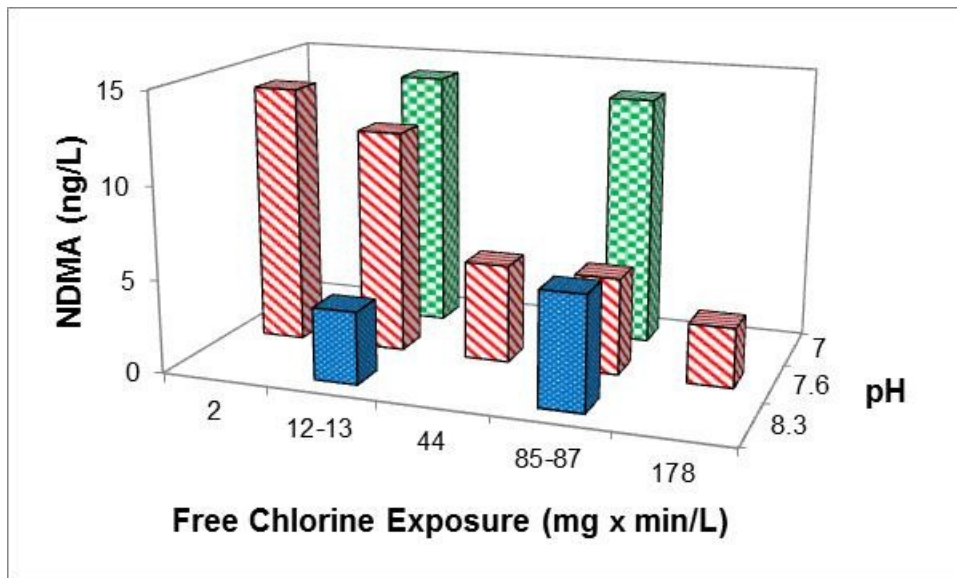

**Figure S2. Impact of free chlorine exposure (pH 7.6) and pH at selected conditions on NDMA formation in DWTP 3 settled water during post-chloramination (pH 8.3, 25°C, 6.5 days). Blank spot indicates that test condition was not evaluated.**

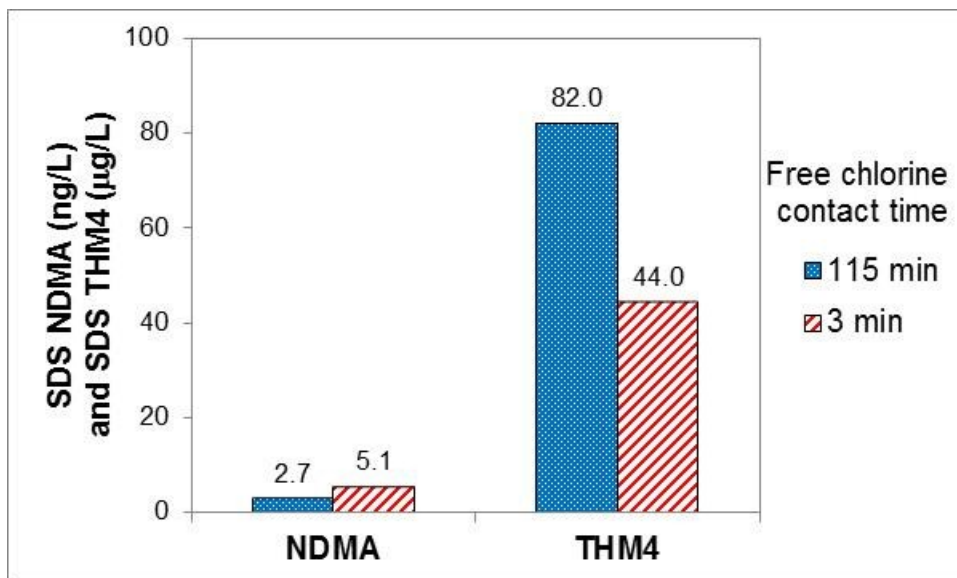

**Figure S3. Impact of free chlorine contact time (pH 7.2) on SDS NDMA and SDS THM4 formation in DWTP 12 raw water during post-chloramination (pH 8, 25°C, 3 days).**
